# Supplementary material
Source: publisher figshare collection journal article supplement (https://acs.figshare.com/ndownloader/files/25528652)
Supplement: Supplementary file 1 [file 25528652]

## Electronic Supporting Information

for

### **Bifurcated $\mu_2$ -I $\cdots$ (N,O) Halogen Bonding: The Case of (Nitrosoguanidinate)Ni<sup>II</sup> Co-crystals with Iodine(I)-based $\sigma$ -Hole Donors**

Zarina M. Efimenko, Anastasiya A. Eliseeva, Daniil M. Ivanov, Bartomeu Galmés,

Antonio Frontera,\* Nadezhda A. Bokach,\* Vadim Yu. Kukushkin\*

#### Table of Contents

|                                                     |    |
|-----------------------------------------------------|----|
| Crystal data and structure refinement               | 2  |
| View of the molecular structure of adducts with HSA | 4  |
| Results of the Hirshfeld surface analysis           | 15 |
| Description of hydrogen bonds and other contacts    | 16 |
| MEP surfaces of the XB donors                       | 18 |

## Crystal data and structure refinement

**Table S1.** Crystal data and structure refinement for **1**·2(1,2-FIB), **1**·C<sub>2</sub>I<sub>4</sub>, **2**·2(1,2-FIB), and **2**·2(1,4-FIB).

|                                                      | <b>1</b> ·2(1,2-FIB)                                                                          | <b>1</b> ·C <sub>2</sub> I <sub>4</sub>                                       | <b>2</b> ·2(1,2-FIB)                                                                          | <b>2</b> ·2(1,4-FIB)                                                                          |
|------------------------------------------------------|-----------------------------------------------------------------------------------------------|-------------------------------------------------------------------------------|-----------------------------------------------------------------------------------------------|-----------------------------------------------------------------------------------------------|
| CCDC No.                                             | 2036670                                                                                       | 2036671                                                                       | 2036672                                                                                       | 2036673                                                                                       |
| Empirical formula                                    | C <sub>18</sub> H <sub>14</sub> F <sub>8</sub> I <sub>4</sub> N <sub>8</sub> NiO <sub>2</sub> | C <sub>8</sub> H <sub>14</sub> I <sub>4</sub> N <sub>8</sub> NiO <sub>2</sub> | C <sub>28</sub> H <sub>18</sub> F <sub>8</sub> I <sub>4</sub> N <sub>8</sub> NiO <sub>2</sub> | C <sub>28</sub> H <sub>18</sub> F <sub>8</sub> I <sub>4</sub> N <sub>8</sub> NiO <sub>2</sub> |
| <i>M<sub>w</sub></i> /g                              | 1092.68                                                                                       | 820.58                                                                        | 1216.81                                                                                       | 1216.81                                                                                       |
| T/K                                                  | 100(2)                                                                                        | 100(2)                                                                        | 100(2)                                                                                        | 100(2)                                                                                        |
| Radiation                                            | Mo Kα (λ = 0.71073)                                                                           | Mo Kα (λ = 0.7107)                                                            | Mo Kα (λ = 0.71073)                                                                           | Mo Kα (λ = 0.7107)                                                                            |
| Crystal color, shape                                 | red, prism                                                                                    | red, prism                                                                    | red, prism                                                                                    | red, prism                                                                                    |
| Crystal size/mm <sup>3</sup>                         | 0.30 × 0.22 × 0.16                                                                            | 0.28 × 0.16 × 0.12                                                            | 0.25 × 0.20 × 0.18                                                                            | 0.26 × 0.18 × 0.14                                                                            |
| Crystal system                                       | triclinic                                                                                     | triclinic                                                                     | monoclinic                                                                                    | triclinic                                                                                     |
| Space group                                          | P-1                                                                                           | P-1                                                                           | P2 <sub>1</sub> /c                                                                            | P-1                                                                                           |
| <i>a</i> /Å                                          | 5.4904(5)                                                                                     | 8.3289(3)                                                                     | 23.1438(4)                                                                                    | 5.6497(4)                                                                                     |
| <i>b</i> /Å                                          | 10.4468(7)                                                                                    | 8.9118(3)                                                                     | 7.99700(10)                                                                                   | 12.4400(13)                                                                                   |
| <i>c</i> /Å                                          | 12.5239(7)                                                                                    | 13.3421(5)                                                                    | 18.8981(3)                                                                                    | 13.0921(4)                                                                                    |
| α/°                                                  | 103.887(5)                                                                                    | 87.145(3)                                                                     | 90                                                                                            | 76.487(5)                                                                                     |
| β/°                                                  | 91.850(6)                                                                                     | 84.833(3)                                                                     | 93.464(2)                                                                                     | 84.740(4)                                                                                     |
| γ/°                                                  | 92.587(7)                                                                                     | 84.478(3)                                                                     | 90                                                                                            | 80.803(8)                                                                                     |
| <i>V</i> /Å <sup>3</sup>                             | 695.94(9)                                                                                     | 980.88(6)                                                                     | 3491.29(9)                                                                                    | 881.75(12)                                                                                    |
| <i>Z</i>                                             | 1                                                                                             | 2                                                                             | 4                                                                                             | 1                                                                                             |
| ρ <sub>c</sub> /g·cm <sup>-3</sup>                   | 2.607                                                                                         | 2.778                                                                         | 2.315                                                                                         | 2.292                                                                                         |
| μ/mm <sup>-1</sup>                                   | 5.222                                                                                         | 7.302                                                                         | 4.177                                                                                         | 4.135                                                                                         |
| <i>F</i> (000)                                       | 506.0                                                                                         | 748.0                                                                         | 2280.0                                                                                        | 570.0                                                                                         |
| 2θ range/°                                           | 5.828 to 54.998                                                                               | 5.42 to 62.238                                                                | 6.196 to 56.998                                                                               | 6.412 to 52                                                                                   |
| Reflections collected                                | 10641                                                                                         | 17909                                                                         | 46994                                                                                         | 7577                                                                                          |
| Independent reflections                              | 3198 [R <sub>int</sub> = 0.0514, R <sub>sigma</sub> = 0.0437]                                 | 5640 [R <sub>int</sub> = 0.0320, R <sub>sigma</sub> = 0.0358]                 | 8840 [R <sub>int</sub> = 0.0393, R <sub>sigma</sub> = 0.0289]                                 | 3446 [R <sub>int</sub> = 0.0424, R <sub>sigma</sub> = 0.0527]                                 |
| Data/restraints/parameters                           | 3198/0/189                                                                                    | 5640/0/212                                                                    | 8840/0/462                                                                                    | 3446/0/233                                                                                    |
| Goodness-of-fit on <i>F</i> <sup>2</sup>             | 1.089                                                                                         | 1.037                                                                         | 1.061                                                                                         | 1.090                                                                                         |
| Final <i>R</i> indexes [ <i>I</i> ≥ 2σ ( <i>I</i> )] | R <sub>1</sub> = 0.0414, wR <sub>2</sub> = 0.1031                                             | R <sub>1</sub> = 0.0252, wR <sub>2</sub> = 0.0465                             | R <sub>1</sub> = 0.0249, wR <sub>2</sub> = 0.0494                                             | R <sub>1</sub> = 0.0439, wR <sub>2</sub> = 0.1067                                             |
| Final <i>R</i> indexes [all data]                    | R <sub>1</sub> = 0.0494, wR <sub>2</sub> = 0.1111                                             | R <sub>1</sub> = 0.0341, wR <sub>2</sub> = 0.0498                             | R <sub>1</sub> = 0.0328, wR <sub>2</sub> = 0.0527                                             | R <sub>1</sub> = 0.0532, wR <sub>2</sub> = 0.1183                                             |
| Largest diff. peak/hole/ e·Å <sup>-3</sup>           | 1.67/-1.94                                                                                    | 1.36/-1.33                                                                    | 0.61/-0.57                                                                                    | 2.38/-1.64                                                                                    |

**Table S2.** Crystal data and structure refinement for **2**·2C<sub>2</sub>I<sub>4</sub>, **3**·2(1,2-FIB), and **3**·2(1,3,5-FIB).

|                                                              | <b>2</b> ·2C <sub>2</sub> I <sub>4</sub>                                       | <b>3</b> ·2(1,2-FIB)                                                                          | <b>3</b> ·2(1,3,5-FIB)                                                                        |
|--------------------------------------------------------------|--------------------------------------------------------------------------------|-----------------------------------------------------------------------------------------------|-----------------------------------------------------------------------------------------------|
| CCDC No.                                                     | 2036674                                                                        | 2036675                                                                                       | 2036676                                                                                       |
| Empirical formula                                            | C <sub>20</sub> H <sub>18</sub> I <sub>8</sub> N <sub>8</sub> NiO <sub>2</sub> | C <sub>24</sub> H <sub>22</sub> F <sub>8</sub> I <sub>4</sub> N <sub>8</sub> NiO <sub>2</sub> | C <sub>24</sub> H <sub>22</sub> F <sub>6</sub> I <sub>6</sub> N <sub>8</sub> NiO <sub>2</sub> |
| <i>M</i> <sub>w</sub> /g                                     | 1476.33                                                                        | 1172.80                                                                                       | 1388.60                                                                                       |
| T/K                                                          | 100(2)                                                                         | 100(2)                                                                                        | 100(2)                                                                                        |
| Radiation                                                    | Mo K $\alpha$ ( $\lambda$ = 0.7107)                                            | Mo K $\alpha$ ( $\lambda$ = 0.7107)                                                           | Mo K $\alpha$ ( $\lambda$ = 0.71073)                                                          |
| Crystal color, shape                                         | red, prism                                                                     | red, prism                                                                                    | red, prism                                                                                    |
| Crystal size/mm <sup>3</sup>                                 | 0.26 × 0.20 × 0.16                                                             | 0.18 × 0.12 × 0.10                                                                            | 0.24 × 0.20 × 0.18                                                                            |
| Crystal system                                               | triclinic                                                                      | triclinic                                                                                     | triclinic                                                                                     |
| Space group                                                  | P-1                                                                            | P-1                                                                                           | P-1                                                                                           |
| <i>a</i> /Å                                                  | 8.3457(4)                                                                      | 8.4755(4)                                                                                     | 9.270(3)                                                                                      |
| <i>b</i> /Å                                                  | 9.9691(3)                                                                      | 9.0877(6)                                                                                     | 9.7991(19)                                                                                    |
| <i>c</i> /Å                                                  | 10.7301(5)                                                                     | 11.8801(8)                                                                                    | 10.790(7)                                                                                     |
| $\alpha$ /°                                                  | 90.952(3)                                                                      | 86.501(5)                                                                                     | 81.20(4)                                                                                      |
| $\beta$ /°                                                   | 106.299(4)                                                                     | 75.723(5)                                                                                     | 71.84(5)                                                                                      |
| $\gamma$ /°                                                  | 90.632(3)                                                                      | 66.104(5)                                                                                     | 72.97(2)                                                                                      |
| <i>V</i> /Å <sup>3</sup>                                     | 856.62(7)                                                                      | 809.98(9)                                                                                     | 888.4(7)                                                                                      |
| <i>Z</i>                                                     | 1                                                                              | 1                                                                                             | 1                                                                                             |
| $\rho_c$ /g·cm <sup>-3</sup>                                 | 2.862                                                                          | 2.404                                                                                         | 2.595                                                                                         |
| $\mu$ /mm <sup>-1</sup>                                      | 7.807                                                                          | 4.496                                                                                         | 5.827                                                                                         |
| <i>F</i> (000)                                               | 662.0                                                                          | 550.0                                                                                         | 638.0                                                                                         |
| 2 $\theta$ range/°                                           | 5.498 to 61.646                                                                | 5.42 to 61.912                                                                                | 5.572 to 62.118                                                                               |
| Reflections collected                                        | 15285                                                                          | 7986                                                                                          | 8478                                                                                          |
| Independent reflections                                      | 4890 [R <sub>int</sub> = 0.0367, R <sub>sigma</sub> = 0.0398]                  | 4466 [R <sub>int</sub> = 0.0328, R <sub>sigma</sub> = 0.0591]                                 | 4894 [R <sub>int</sub> = 0.0329, R <sub>sigma</sub> = 0.0517]                                 |
| Data/restraints/parameters                                   | 4890/0/179                                                                     | 4466/0/214                                                                                    | 4894/0/214                                                                                    |
| Goodness-of-fit on <i>F</i> <sup>2</sup>                     | 1.064                                                                          | 1.014                                                                                         | 0.940                                                                                         |
| Final <i>R</i> indexes [ <i>I</i> ≥ 2 $\sigma$ ( <i>I</i> )] | R <sub>1</sub> = 0.0251, wR <sub>2</sub> = 0.0467                              | R <sub>1</sub> = 0.0381, wR <sub>2</sub> = 0.0754                                             | R <sub>1</sub> = 0.0243, wR <sub>2</sub> = 0.0404                                             |
| Final <i>R</i> indexes [all data]                            | R <sub>1</sub> = 0.0330, wR <sub>2</sub> = 0.0497                              | R <sub>1</sub> = 0.0557, wR <sub>2</sub> = 0.0831                                             | R <sub>1</sub> = 0.0344, wR <sub>2</sub> = 0.0430                                             |
| Largest diff. peak/hole/ <i>e</i> ·Å <sup>-3</sup>           | 0.88/-1.08                                                                     | 1.86/-0.94                                                                                    | 1.28/-1.23                                                                                    |

## View of the molecular structure of adducts with HSA

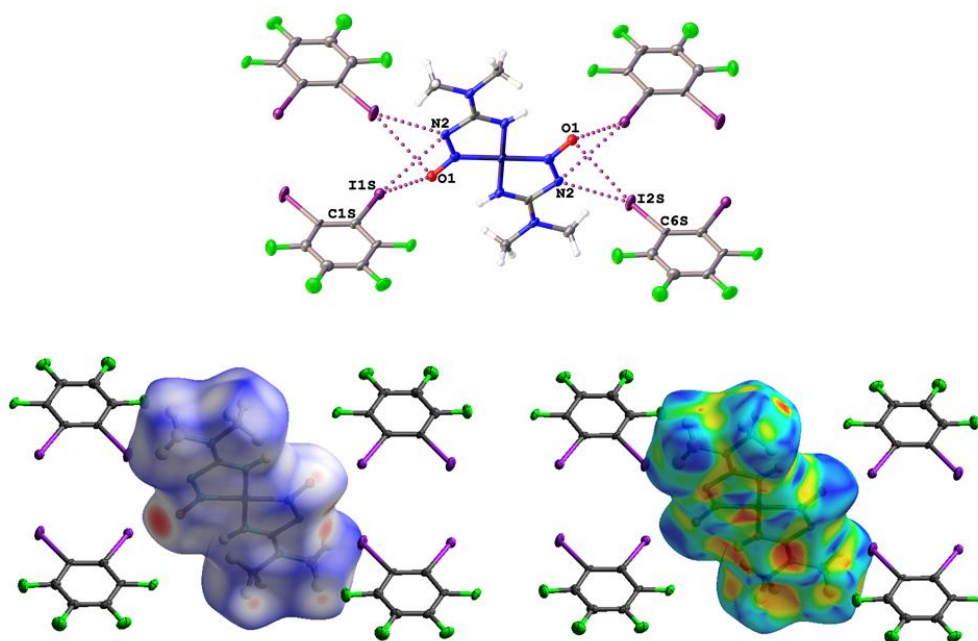

**Figure S1.** View of the molecular structure of **1·2(1,2-FIB)** with bifurcated XB (dotted lines) between I atom of 1,2-FIB and N and O atoms of the nitrosoguanidinate ligand. Here and later thermal ellipsoids are shown at the 50% probability level (top). HSA mapped with  $d_{\text{norm}}$  over the range  $-0.2744$  (red) to  $1.1474$  (blue) and shape index  $S$ , mapped from  $-1.0$  (concave hollows; red)  $-1 \rightarrow 0.0$  (minimal saddle; green)  $\rightarrow +1.0$  (convex bumps; blue) for **1** in the XRD structure of **1·2(1,2-FIB)** (bottom).

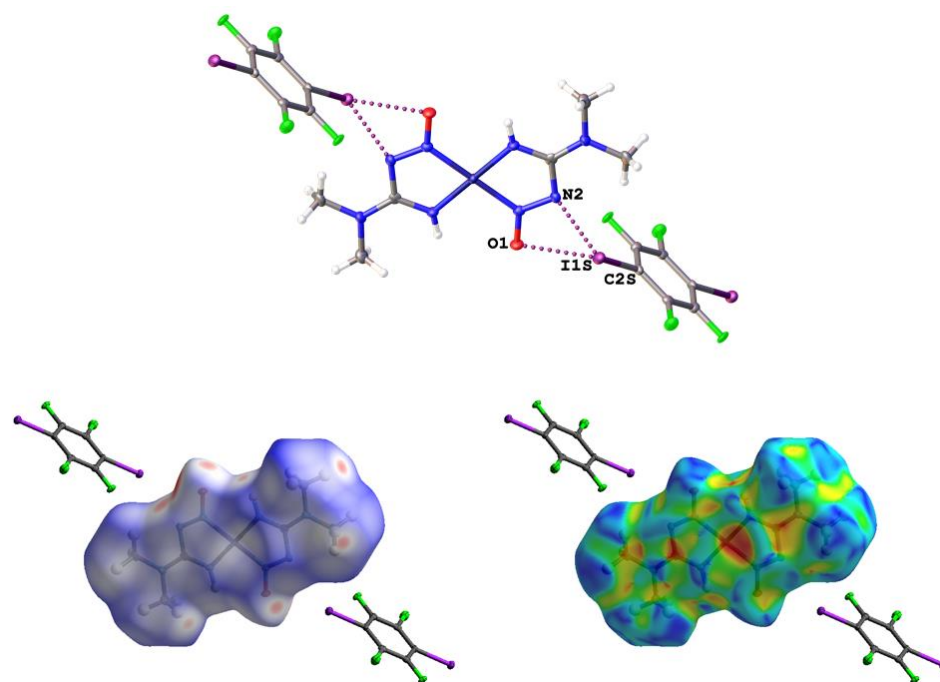

**Figure S2.** View of the molecular structure of **1**·(1,4-FIB) with bifurcated XB (dotted lines) between I atom of 1,4-FIB and N and O atoms of the nitrosoguanidinate ligand (top). HSA mapped with  $d_{\text{norm}}$  over the range  $-0.2744$  (red) to  $1.1474$  (blue) and shape index  $S$ , mapped from  $-1.0$  (concave hollows; red)  $-1 \rightarrow 0.0$  (minimal saddle; green)  $\rightarrow +1.0$  (convex bumps; blue) for **1** in the XRD structure of **1**·(1,4-FIB) (bottom).

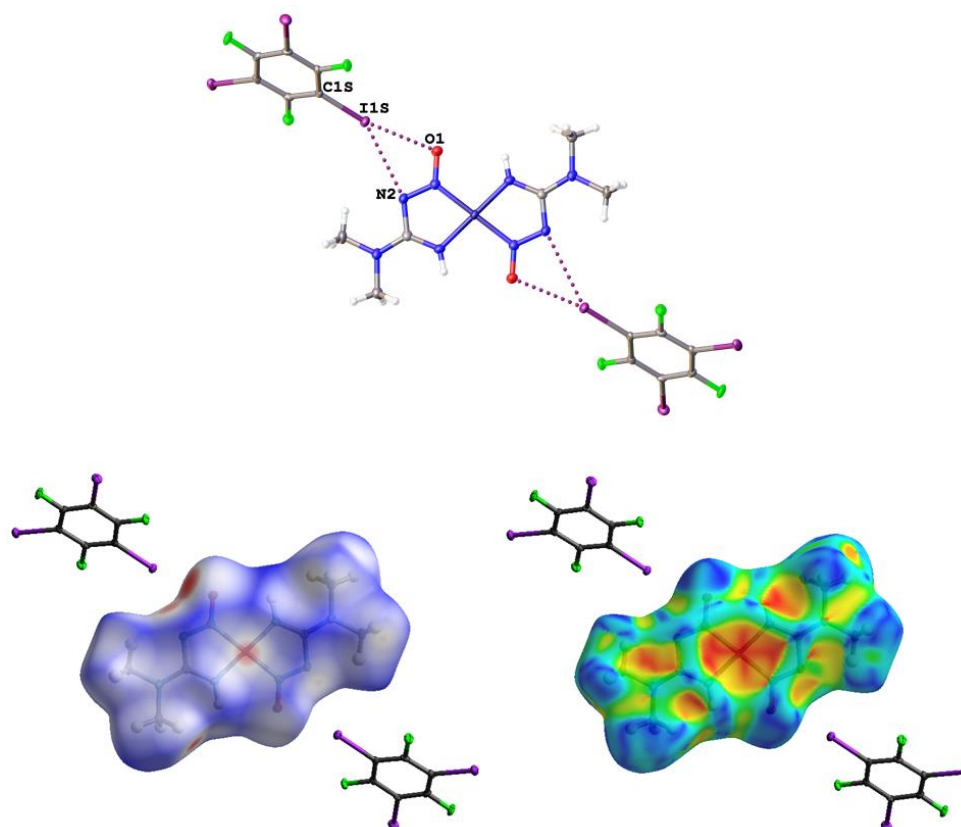

**Figure S3.** View of the molecular structure of **1·2(1,3,5-FIB)** with bifurcated XB (dotted lines) between I atom of 1,3,5-FIB and N and O atoms of the nitrosoguanidinate ligand (top). HSA mapped with  $d_{\text{norm}}$  over the range  $-0.2744$  (red) to  $1.1474$  (blue) and shape index  $S$ , mapped from  $-1.0$  (concave hollows; red)  $-1 \rightarrow 0.0$  (minimal saddle; green)  $\rightarrow +1.0$  (convex bumps; blue) for **1** in the XRD structure of **1·2(1,3,5-FIB)** (bottom).

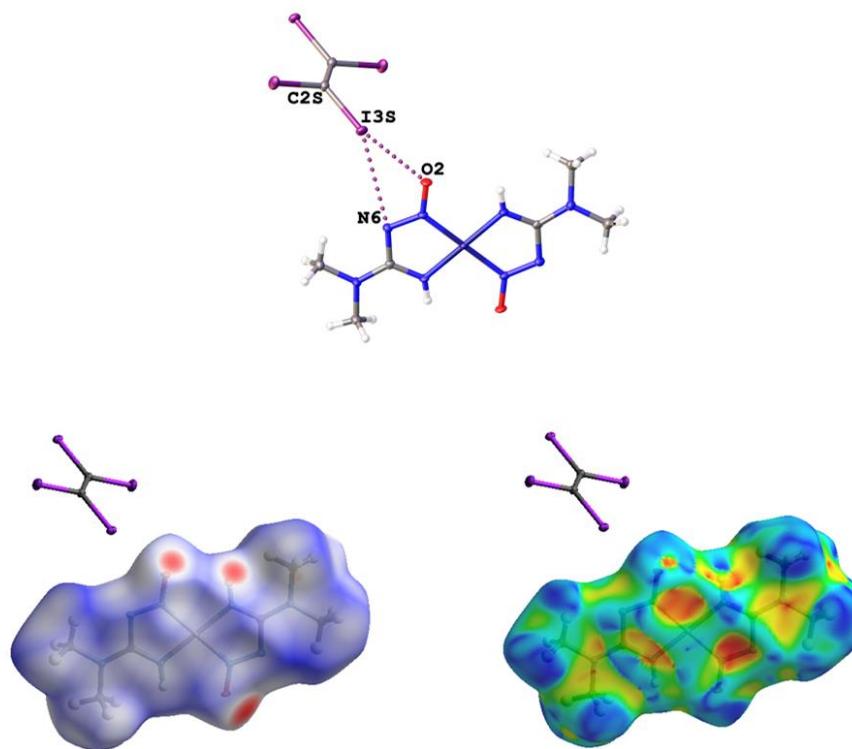

**Figure S4.** View of the molecular structure of **1**·C<sub>2</sub>I<sub>4</sub> with bifurcated XB (dotted lines) between I atom of C<sub>2</sub>I<sub>4</sub> and N and O atoms of the nitrosoguanidinate ligand (top). HSA mapped with  $d_{\text{norm}}$  over the range  $-0.2744$  (red) to  $1.1474$  (blue) and shape index  $S$ , mapped from  $-1.0$  (concave hollows; red)  $-1 \rightarrow 0.0$  (minimal saddle; green)  $\rightarrow +1.0$  (convex bumps; blue) for **1** in the XRD structure of **1**·C<sub>2</sub>I<sub>4</sub> (bottom).

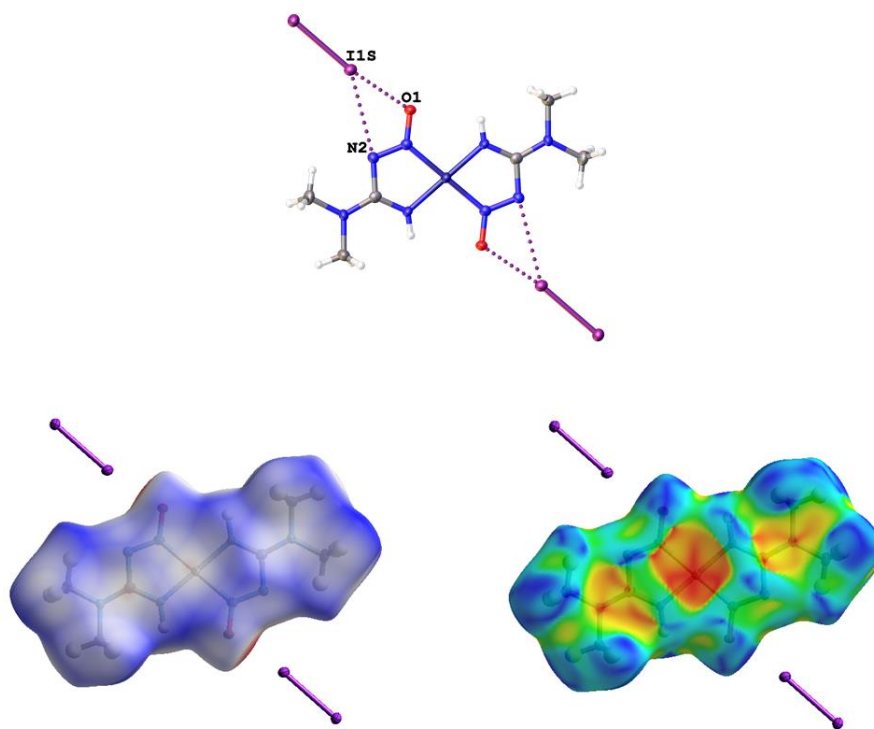

**Figure S5.** View of the molecular structure of **1**·2I<sub>2</sub> with bifurcated XB (dotted lines) between I atom of I<sub>2</sub> and N and O atoms of the nitrosoguanidinate ligand (top). HSA mapped with  $d_{\text{norm}}$  over the range  $-0.2744$  (red) to  $1.1474$  (blue) and shape index  $S$ , mapped from  $-1.0$  (concave hollows; red)  $\rightarrow 0.0$  (minimal saddle; green)  $\rightarrow +1.0$  (convex bumps; blue) for **1** in the XRD structure of **1**·2I<sub>2</sub> (bottom).



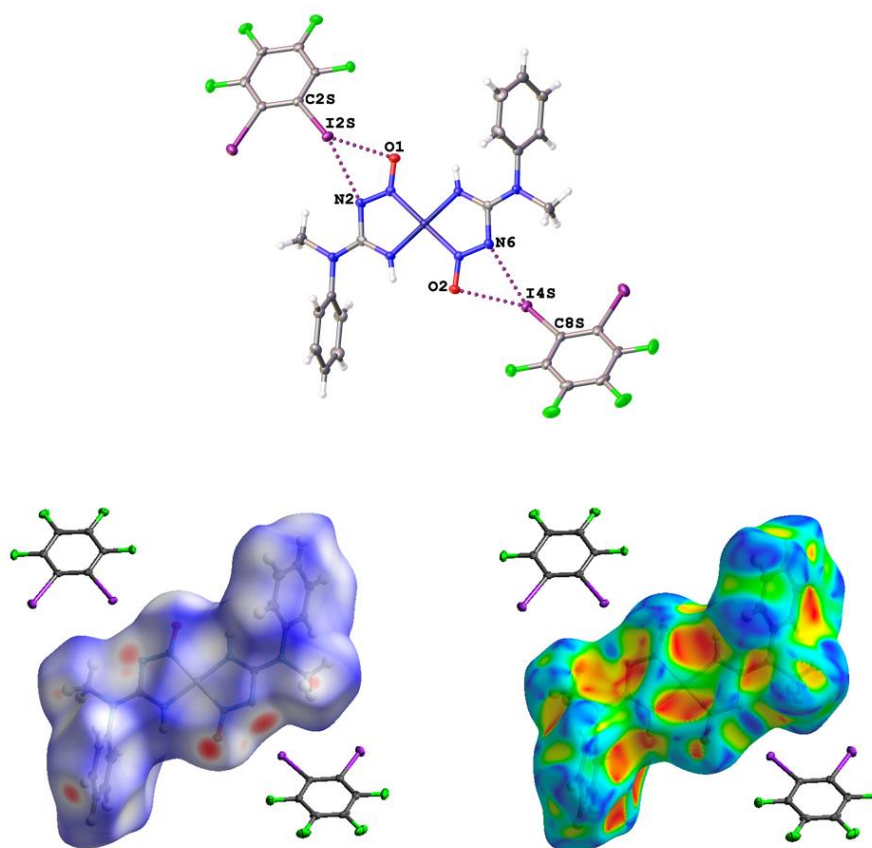

**Figure S6.** View of the molecular structure of **2·2(1,2-FIB)** with bifurcated XB (dotted lines) between I atom of 1,2-FIB and N and O atoms of the nitrosoguanidinate ligand (top). HSA mapped with  $d_{\text{norm}}$  over the range  $-0.2744$  (red) to  $1.1474$  (blue) and shape index  $S$ , mapped from  $-1.0$  (concave hollows; red)  $-1 \rightarrow 0.0$  (minimal saddle; green)  $\rightarrow +1.0$  (convex bumps; blue) for **2** in the XRD structure of **2·2(1,2-FIB)** (bottom).

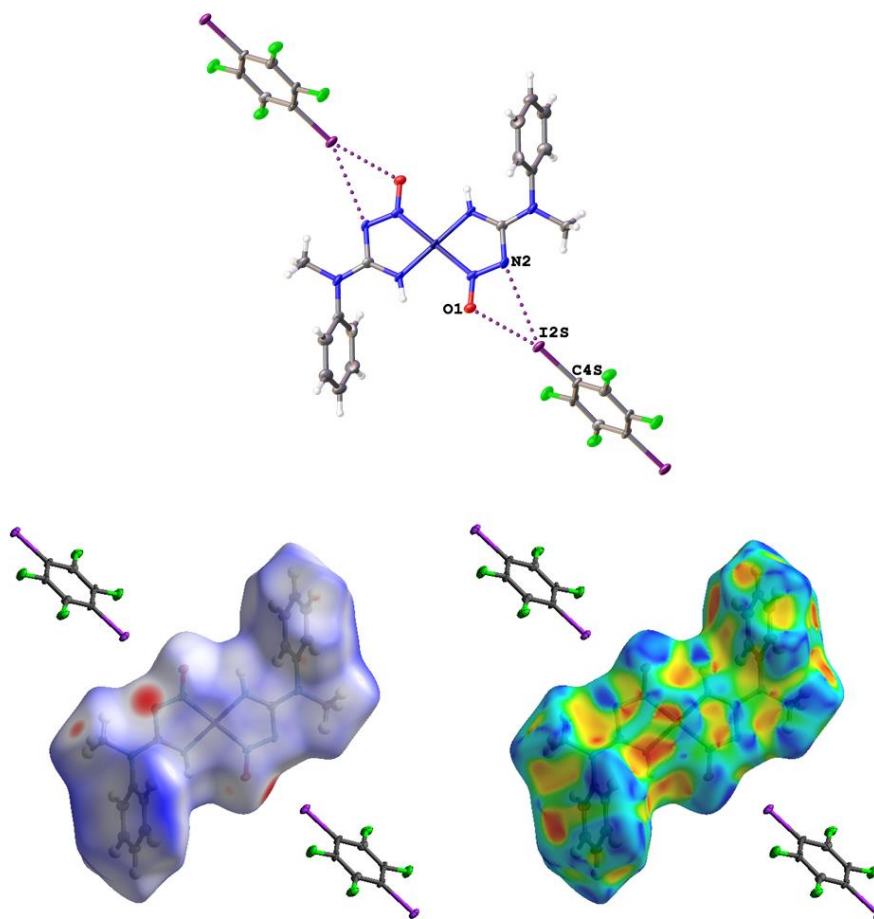

**Figure S7.** View of the molecular structure of **2**·**2**(1,4-FIB) with bifurcated XB (dotted lines) between I atom of 1,4-FIB and N and O atoms of the nitrosoguanidinate ligand (top). HSA mapped with  $d_{\text{norm}}$  over the  $-0.2744$  (red) to  $1.1474$  (blue) and shape index  $S$ , mapped from  $-1.0$  (concave hollows; red)  $-1 \rightarrow 0.0$  (minimal saddle; green)  $\rightarrow +1.0$  (convex bumps; blue) for **2** in the XRD structure of **2**·**2**(1,4-FIB) (bottom).

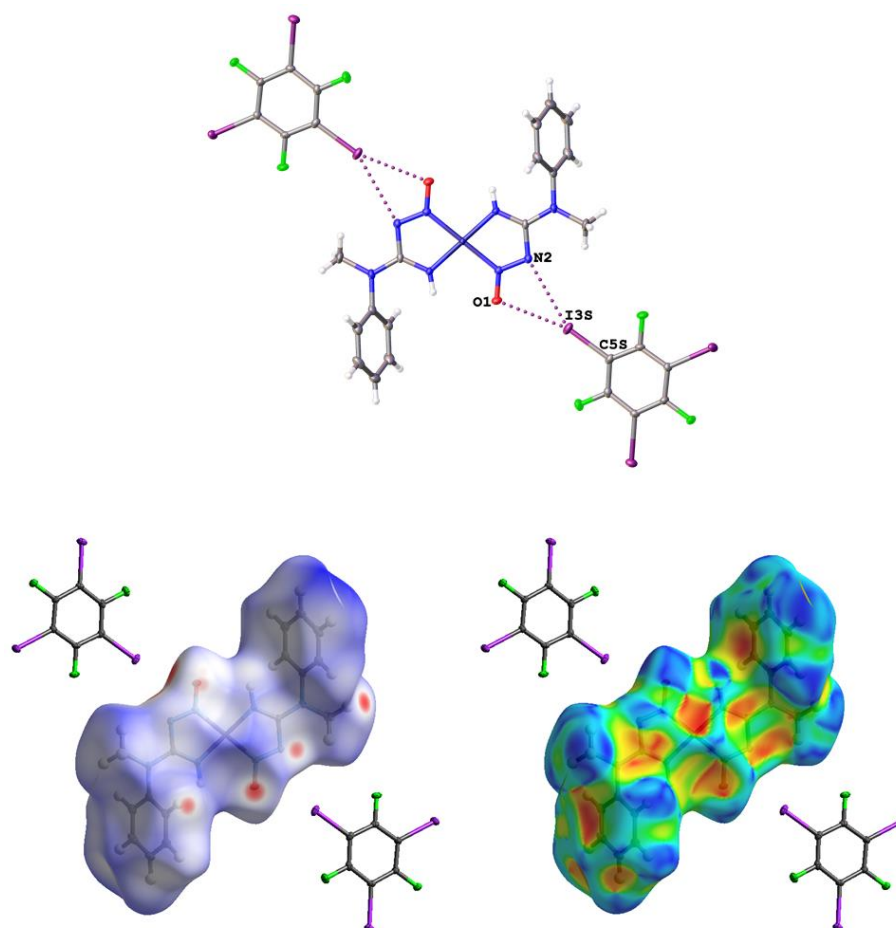

**Figure S8.** View of the molecular structure of **2**·2(1,3,5-FIB) with bifurcated XB (dotted lines) between I atom of 1,3,5-FIB and N and O atoms of the nitrosoguanidinate ligand (top). HSA mapped with  $d_{\text{norm}}$  over the range  $-0.2744$  (red) to  $1.1474$  (blue) and shape index  $S$ , mapped from  $-1.0$  (concave hollows; red)  $-1 \rightarrow 0.0$  (minimal saddle; green)  $\rightarrow +1.0$  (convex bumps; blue) for **2** in the XRD structure of **2**·2(1,3,5-FIB) (bottom).

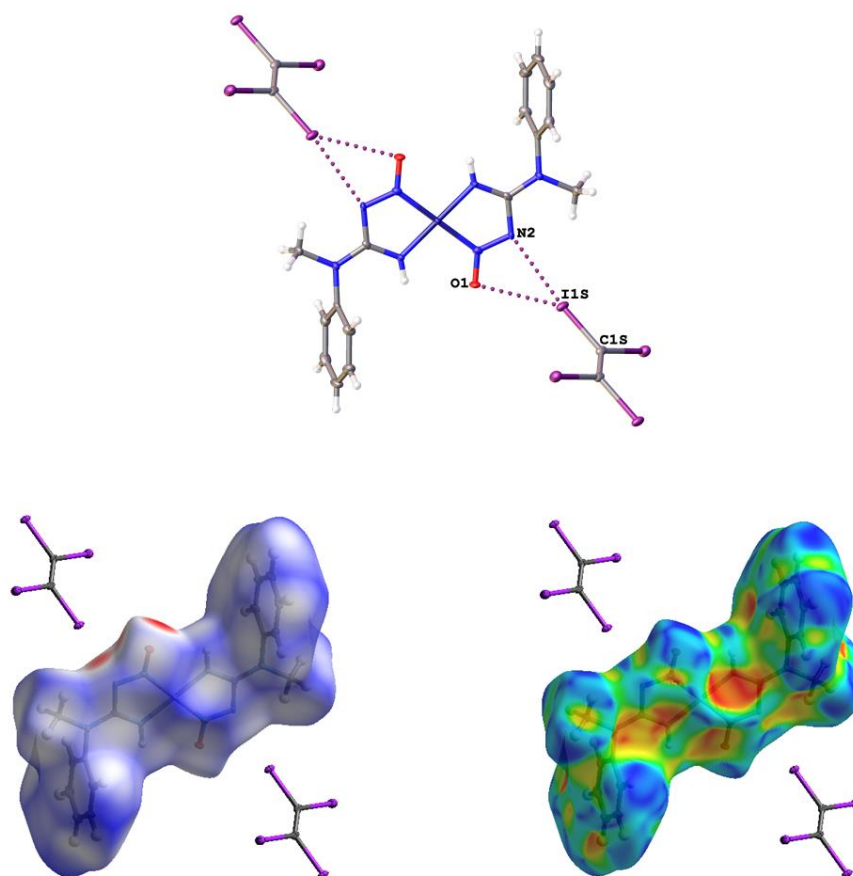

**Figure S9.** View of the molecular structure of **2**·2C<sub>2</sub>I<sub>4</sub> with bifurcated XB (dotted lines) between I atom of C<sub>2</sub>I<sub>4</sub> and N and O atoms of the nitrosoguanidinate ligand. (top). HSA mapped with  $d_{\text{norm}}$  over the range  $-0.2744$  (red) to  $1.1474$  (blue) and shape index  $S$ , mapped from  $-1.0$  (concave hollows; red)  $\rightarrow 0.0$  (minimal saddle; green)  $\rightarrow +1.0$  (convex bumps; blue) for **2** in the XRD structure of **2**·2C<sub>2</sub>I<sub>4</sub> (bottom).

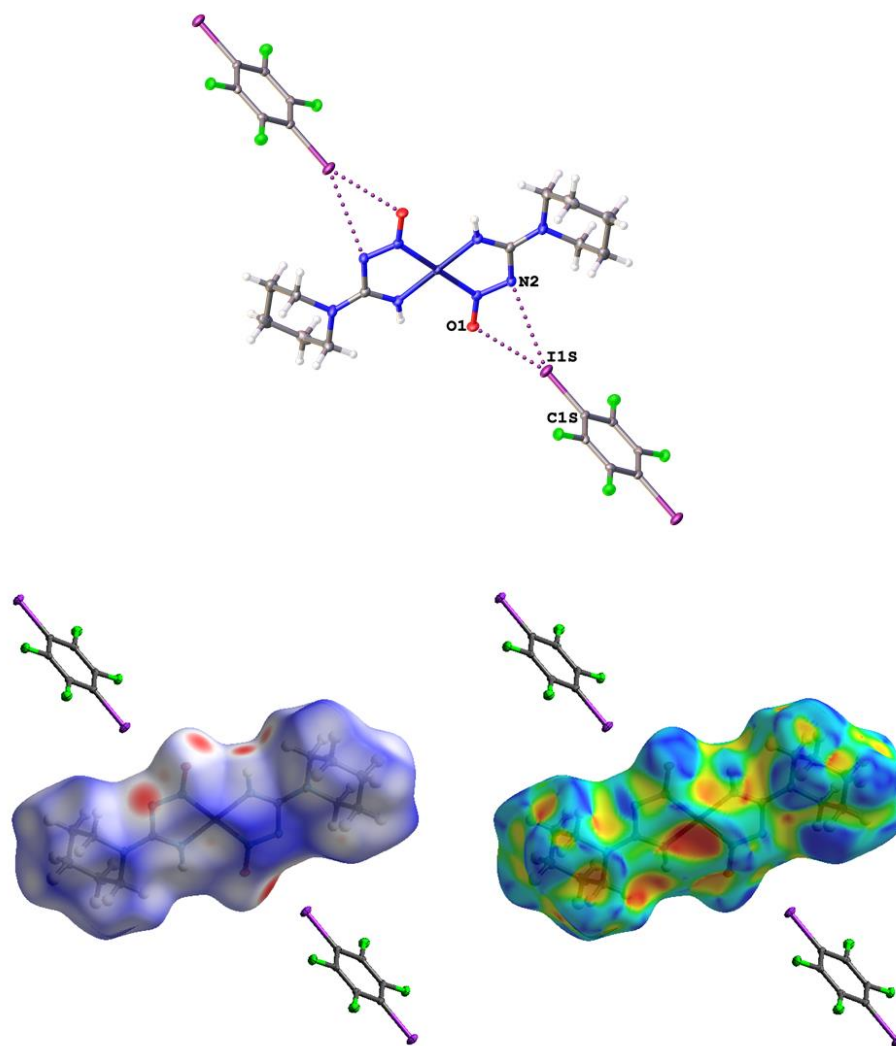

**Figure S10.** View of the molecular structure of **3**·2(1,4-FIB) with bifurcated XB (dotted lines) between I atom of 1,4-FIB and N and O atoms of the nitrosoguanidinate ligand (top). HSA mapped with  $d_{\text{norm}}$  over the range  $-0.2744$  (red) to  $1.1474$  (blue) and shape index  $S$ , mapped from  $-1.0$  (concave hollows; red)  $-1 \rightarrow 0.0$  (minimal saddle; green)  $\rightarrow +1.0$  (convex bumps; blue) for **3** in the XRD structure of **3**·2(1,4-FIB) (bottom).

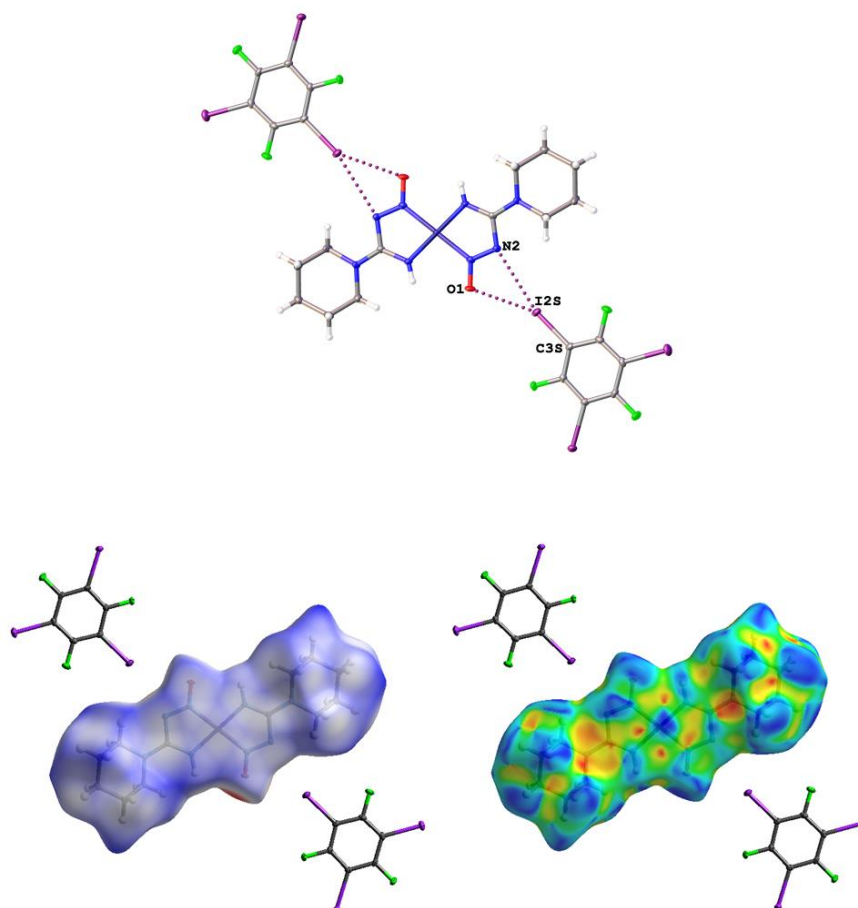

**Figure S11.** View of the molecular structure of **3**·2(1,3,5-FIB) with bifurcated XB (dotted lines) between I atom of 1,3,5-FIB and N and O atoms of the nitrosoguanidinate ligand (top). HSA mapped with  $d_{\text{norm}}$  over the range  $-0.2744$  (red) to  $1.1474$  (blue) and shape index  $S$ , mapped from  $-1.0$  (concave hollows; red)  $-1 \rightarrow 0.0$  (minimal saddle; green)  $\rightarrow +1.0$  (convex bumps; blue) for **3** in the XRD structure of **3**·2(1,3,5-FIB) (bottom).

## Results of the Hirshfeld surface analysis

**Table S3.** Results of the Hirshfeld surface analysis for **1**, **2**, and **3** in X-ray structures of the co-crystals.

| X-ray structure                             | Contributions of various intermolecular contacts to the molecular Hirshfeld surface of <b>1</b> , <b>2</b> , and <b>3</b>                                      |
|---------------------------------------------|----------------------------------------------------------------------------------------------------------------------------------------------------------------|
| <b>1</b> ·2(1,2-FIB)                        | H-F 35.2%, H-N/N-H 16.4%, H-O/O-H 7.2%, H-I 7.1%, H-H 5.9%, O-I 5.7%, H-C/C-H 5.2%, N-I 3.5%, H-Ni/Ni-H 2.6%, N-Ni/Ni-N 2.6%, C-N/N-C 2.2%, O-C 2.1%, N-N 2.0% |
| <b>1</b> ·(1,4-FIB)                         | H-F 22.5%, H-N/N-H 19.4%, H-O/O-H 14.3%, H-H 10.5%, H-I 9.0%, H-C/C-H 5.7%, H-Ni/Ni-H 4.2%, N-N 3.6%, O-I 2.0%, O-C 1.8%, C-N/N-C 1.7%, O-F 1.4%               |
| <b>1</b> ·2(1,3,5-FIB)                      | H-F 26.1%, H-N/N-H 15.8%, H-H 15.6%, H-I 10.9%, O-I 7.0%, N-I 6.3%, H-C/C-H 5.0%, H-O/O-H 4.8%, O-C 3.1%, Ni-I 2.6%, N-F 1.4%                                  |
| <b>1</b> ·C <sub>2</sub> I <sub>4</sub>     | H-N/N-H 23.2%, H-I 21.9%, H-O/O-H 20.6%, H-H 17.2%, H-Ni/Ni-H 4.2%, H-C/C-H 3.2%, %, N-I 2.1%, C-N/N-C 2.0%, O-I 1.8%, N-Ni/Ni-N 1.2%, N-N 1.2%                |
| <b>1</b> ·2I <sub>2</sub>                   | H-I 26.3%, H-H 23.6%, H-N/N-H 16.6%, H-O/O-H 16.2%, N-I 7.3%, O-I 4.8%, C-I 2.8%, Ni-I 2.6%                                                                    |
| <b>2</b> ·2(1,2-FIB)                        | H-F 28.1%, H-N/N-H 21.3%, H-H 16.7%, H-I 9.0%, H-O/O-H 7.8%, C-H/H-C 7.0%, N-I 5.0%, C-F 3.8%, O-F 3.4%, H-Ni/Ni-H 3.1%, C-I 2.3%, C-C 2.4%, N-F 1.3%          |
| <b>2</b> ·2(1,4-FIB)                        | H-H 27.0%, H-F 19.5%, C-H/H-C 12.8%, H-I 7.1%, H-O/O-H 6.0%, H-N/N-H 4.8%, O-I 3.9%, N-I 3.7%, H-Ni/Ni-H 3.4%, C-F 2.9%, N-N 2.9%, C-N/N-C 2.2%, C-O/O-C 1.8%  |
| <b>2</b> ·2(1,3,5-FIB)                      | H-H 19.2%, H-F 18.8%, H-I 13.8%, C-H/H-C 11.6%, H-N/N-H 10.6%, H-O/O-H 9.1%, C-I 4.2%, O-I 1.9%, c-F 1.3%, H-Ni/Ni-H 1.2%, Ni-F 1.1%                           |
| <b>2</b> ·2(C <sub>2</sub> I <sub>4</sub> ) | H-H 27.1%, H-I 21.9%, C-H/H-C 17.8%, H-O/O-H 7.7%, N-I 7.1%, H-N/N-H 6.2%, O-I 5.0%, C-I 3.2%, H-Ni/Ni-H 1.7%                                                  |
| <b>3</b> ·2(1,2-FIB)                        | H-F 28.9%, H-H 18.2%, H-N/N-H 11.9%, H-O/O-H 11.7%, H-I 6.8%, C-H/H-C 6.2%, H-Ni/Ni-H 4.1%, N-I 3.3%, N-F 2.9%, O-F 2.2%, O-I 1.7%, C-F 1.1%                   |
| <b>3</b> ·2(1,4-FIB)                        | H-H 25.7%, H-F 22.7%, H-N/N-H 14.2%, H-I 9.5%, H-O/O-H 5.1%, C-H/H-C 5.0%, H-Ni/Ni-H 4.6%, N-I 4.2%, O-I 3.7%, O-C 2.8%                                        |
| <b>3</b> ·2(1,3,5-FIB)                      | H-H 22.0%, H-F 21.4%, H-I 20.3%, H-C 7.3%, O-I 6.3%, N-C 5.5%, N-I 5.1%, O-F 3.0%, Ni-C 2.0%, N-F 2.0%, C-I 1.2%                                               |

## Description of hydrogen bonds and other contacts

**HB.** In the crystal structures of all adducts, we identified the following HBs: N–H...F HB in **1**·2(1,2-FIB), **1**·(1,4-FIB), **3**·2(1,2-FIB), and **3**·2(1,4-FIB), C–H...F in **1**·2(1,2-FIB), **1**·(1,4-FIB), **1**·2(1,3,5-FIB), **2**·2(1,2-FIB), **2**·2(1,4-FIB), **2**·2(1,3,5-FIB), **3**·2(1,2-FIB), and **3**·2(1,4-FIB), N–H...I in **1**·2I<sub>2</sub>, and **3**·2(1,3,5-FIB), C–H...I in **1**·2I<sub>2</sub>, **1**·C<sub>2</sub>I<sub>4</sub>, **2**·2(1,2-FIB), and **3**·2(1,3,5-FIB), N–H...O= in **1**·C<sub>2</sub>I<sub>4</sub>, C–H...O= in **1**·C<sub>2</sub>I<sub>4</sub>, **2**·2(1,2-FIB), **2**·2(1,4-FIB), and **2**·2(1,3,5-FIB), and C–H...N in **1**·C<sub>2</sub>I<sub>4</sub>, **1**·2(1,3,5-FIB), **2**·2(1,3,5-FIB), and **3**·2(1,2-FIB) (**Table S4**). As is follows from **Table S4**, HB with F are characteristic for adducts with perfluorinated arenes, while for adducts of I<sub>2</sub> and C<sub>2</sub>I<sub>4</sub> HB with I are predominant. The strongest HB were found in adducts **1**·2(1,3,5-FIB) (C2–H2C...F2S 2.373 Å), **1**·C<sub>2</sub>I<sub>4</sub> (N3–H3...O2 2.394 Å), and **2**·2(1,2-FIB) (C16–H16...F5S 2.374 and C15–H15...O2 2.384 Å).

**Table S4.** Parameters of HB in the studied co-crystals.

| Co-crystals                             | Contact A–H...B  | A...B, Å | ∠(A–H...B), ° |
|-----------------------------------------|------------------|----------|---------------|
| <b>1</b> ·2(1,2-FIB)                    | N3–H3...F1S      | 3.272(5) | 149.7         |
|                                         | C2–H2A...F2S     | 3.362(6) | 142.7         |
|                                         | C3–H3C...F3S     | 3.387(7) | 144.7         |
| <b>1</b> ·(1,4-FIB)                     | N3–H3...F2S      | 3.424(4) | 163.8         |
|                                         | C2–H2B...F1S     | 3.393(4) | 153.1         |
|                                         | C2–H2C...I1S     | 4.066(4) | 178.2         |
| <b>1</b> ·2(1,3,5-FIB)                  | C2–H2A...F1S     | 3.392(5) | 139.1         |
|                                         | C2–H2C...F2S     | 3.270(7) | 151.9         |
|                                         | C3–H3C...N2      | 3.467(8) | 138.5         |
| <b>1</b> ·C <sub>2</sub> I <sub>4</sub> | N3–H3...O2       | 3.054(4) | 133.9         |
|                                         | C3–H3C...O1      | 3.213(4) | 127.4         |
|                                         | C3–H3A...I3S     | 3.836(3) | 136.3         |
|                                         | C6–H6B...I3S     | 4.080(4) | 160.6         |
|                                         | C6–H6A...N2      | 3.507(4) | 144.9         |
|                                         | N8–H8...O1       | 3.236(4) | 124.6         |
|                                         | C6–H6A...O1      | 3.642(4) | 162.4         |
| <b>1</b> ·2I <sub>2</sub>               | N3–H3...I2S–I1S  | 3.926(3) | 174.5         |
|                                         | C2–H2B...I2S–I1S | 3.951(4) | 165           |
| <b>2</b> ·2(1,2-FIB)                    | C7–H7A...O1      | 3.328(4) | 153.9         |
|                                         | C15–H15...O2     | 3.269(3) | 158.8         |
|                                         | C8–H8...F1S      | 3.172(3) | 117.9         |
|                                         | C16–H16...F5S    | 3.190(3) | 146.2         |
|                                         | C2–H2A...F1S     | 3.450(3) | 152           |
|                                         | C10–H10A...F6S   | 3.295(3) | 136.1         |
|                                         | C2–H2C...I2S     | 3.972(3) | 164.2         |



|   |                |                                                            |                                               |                                  |
|---|----------------|------------------------------------------------------------|-----------------------------------------------|----------------------------------|
| ¶ | 2·2(1,4-FIB)   | C8–H8···O1<br>C2–H2A···F1S<br>C7–H7···F3S<br>C6–H6···F2S   | 3.286(10)<br>3.219(6)<br>3.292(9)<br>3.336(8) | 130.2<br>142.2<br>132.2<br>131.7 |
|   | 2·2(1,3,5-FIB) | C2–H2B···O1<br>C4–H4A···N2<br>C5–H5···F2S                  | 3.389(3)<br>3.441(3)<br>3.210(3)              | 161.9<br>151<br>118.3            |
|   | 3·2(1,2-FIB)   | N3–H3···F2S<br>C6–H6B···F2S<br>C5–H5B···F3S<br>C4–H4A···N1 | 3.131(5)<br>3.448(6)<br>3.648(4)<br>3.506(6)  | 123.4<br>142.6<br>130.2<br>137   |
|   | 3·2(1,4-FIB)   | N3–H3···F2S<br>C2–H2B···F1S                                | 3.248(3)<br>3.405(3)                          | 168<br>171.7                     |
|   | 3·2(1,3,5-FIB) | N3–H3···I1S<br>C6–H6A···I1S                                | 3.959(4)<br>4.027(3)                          | 160.7<br>147.4                   |

R is interatomic distance to vdW sum ratio, the sum of Bondi vdW radii  $R_{\text{vdW}}(\text{H}) + R_{\text{vdW}}(\text{O}) = 2.72$ ,  $R_{\text{vdW}}(\text{H}) + R_{\text{vdW}}(\text{N}) = 2.75$ ,  $R_{\text{vdW}}(\text{H}) + R_{\text{vdW}}(\text{F}) = 2.67$ , and  $R_{\text{vdW}}(\text{H}) + R_{\text{vdW}}(\text{I}) = 3.18$  Å.

**Table S5.** Parameters of lone pair– $\pi$  interactions in the studied co-crystals.

| Co-crystals                     | Contact C···X–R | C···X, Å | R <sup>¶</sup> | $\angle(\text{C} \cdots \text{X} - \text{R}), ^\circ$ | Comments                                                     |
|---------------------------------|-----------------|----------|----------------|-------------------------------------------------------|--------------------------------------------------------------|
| 1·(1,4-FIB)                     | C3S···O1–N1     | 3.067(4) | 0.95           | 164.4(2)                                              | lp(O)– $\pi$ h(Ar <sub>F</sub> ) reported, Ref. <sup>2</sup> |
| 1·2(1,3,5-FIB)                  | C6S···I3S–C3S   | 3.598(5) | 0.98           | 73.73(16)                                             | lp(I)– $\pi$ h(Ar <sub>F</sub> ) reported, Ref. <sup>1</sup> |
| 1·C <sub>2</sub> I <sub>4</sub> | C1S···I4S–C2S   | 3.639(3) | 0.99           | 138.30(11)                                            | lp(I)– $\pi$ h(C <sub>2</sub> I <sub>4</sub> )               |
| 1·2I <sub>2</sub>               | C1···I1S–I2S    | 3.598(5) | 0.98           | 82.13(6)                                              | lp(I)– $\pi$ h(C <sub>NG</sub> ) reported, Ref. <sup>1</sup> |
| 2·2(1,2-FIB)                    | C1···I1S–C1S    | 3.609(3) | 0.98           | 130.11(8)                                             | lp(I)– $\pi$ h(C <sub>NG</sub> )                             |
|                                 | C9···I3S–C7S    | 3.648(3) | 0.99           | 123.47(8)                                             | lp(I)– $\pi$ h(C <sub>NG</sub> )                             |
|                                 | C11S···I4S–C8S  | 3.682(3) | 1.00           | 84.47(8)                                              | lp(I)– $\pi$ h(Ar <sub>F</sub> )                             |
|                                 | C5S···I2S–C2S   | 3.664(3) | 1.00           | 81.08(8)                                              | lp(I)– $\pi$ h(Ar <sub>F</sub> )                             |
|                                 | C10S···O2–N5    | 3.012(4) | 0.94           | 145.33(16)                                            | lp(O)– $\pi$ h(Ar <sub>F</sub> )                             |
|                                 | C11S···O2–N5    | 3.099(4) | 0.96           | 157.46(16)                                            | lp(O)– $\pi$ h(Ar <sub>F</sub> )                             |
| 2·2(1,3,5-FIB)                  | C4S···O1–N1     | 3.132(3) | 0.97           | 86.30(13)                                             | lp(O)– $\pi$ h(Ar <sub>F</sub> )                             |
|                                 | C3S···O1–N1     | 3.186(3) | 0.99           | 111.50(14)                                            | reported, Ref. <sup>2</sup>                                  |
| 3·2(1,4-FIB)                    | C3S···O1–N1     | 2.903(3) | 0.90           | 159.06(16)                                            | lp(O)– $\pi$ h(Ar <sub>F</sub> ) reported, Ref. <sup>2</sup> |
|                                 | C4S···F1S–C2S   | 3.076(3) | 0.96           | 109.07(14)                                            | lp(I)– $\pi$ h(Ar <sub>F</sub> )                             |

¶R is interatomic distance to vdW sum ratio, the sum of Bondi vdW radii  $R_{\text{vdW}}(\text{C}) + R_{\text{vdW}}(\text{O}) = 3.22$ ,  $R_{\text{vdW}}(\text{C}) + R_{\text{vdW}}(\text{I}) = 3.68$ , and  $R_{\text{vdW}}(\text{C}) + R_{\text{vdW}}(\text{F}) = 3.17$  Å.

**Table S6.** Parameters of Type II halogen–halogen interactions in the structures of 1·C<sub>2</sub>I<sub>4</sub> and 1·2(1,3,5-FIB).

| Co-crystals                     | Contact C–I···I–C | I···I, Å  | R <sup>¶</sup> | $\angle(\text{C} - \text{I} \cdots \text{I}), ^\circ$ | $\angle(\text{I} \cdots \text{I} - \text{C}), ^\circ$ |
|---------------------------------|-------------------|-----------|----------------|-------------------------------------------------------|-------------------------------------------------------|
| 1·C <sub>2</sub> I <sub>4</sub> | C1S–I2S···I3S–C2S | 3.7449(4) | 0.95           | 166.14(9)                                             | 84.20(9)                                              |
| 1·2(1,3,5-FIB)                  | C3S–I2S···I13–C1S | 3.8234(6) | 0.97           | 171.88(12)                                            | 111.50(14)                                            |

¶R is interatomic distance to vdW sum ratio, the sum of Bondi vdW radii  $2R_{\text{vdW}}(\text{I}) = 3.96$  Å.

## MEP surfaces of the XB donors

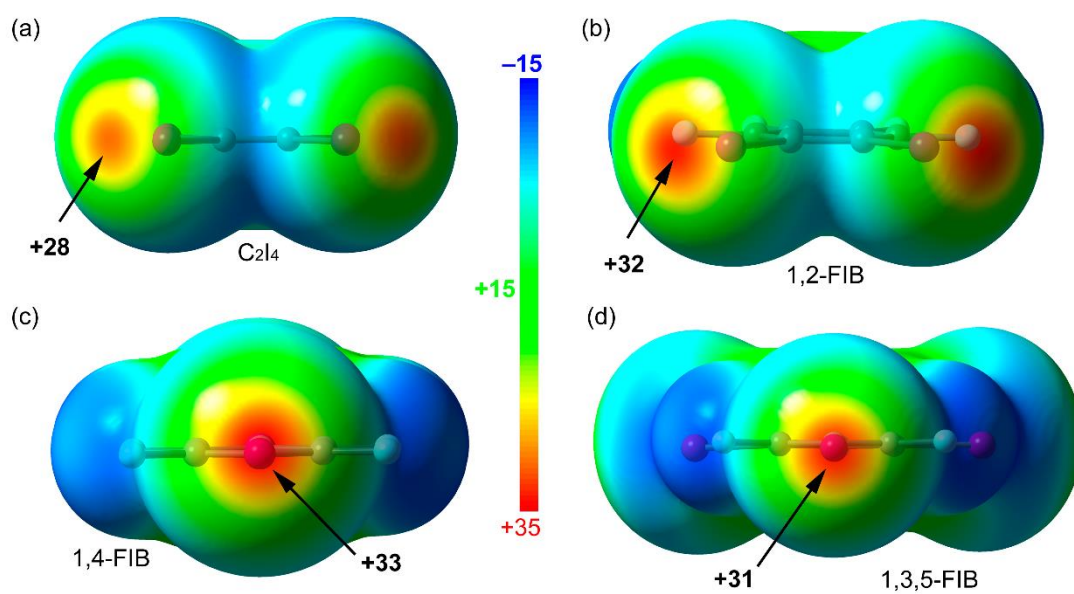

**Figure S12.** MEP surfaces (isosurface 0.001 a.u.) of the XB donors. The energies at selected points of the surfaces are given in kcal/mol.
